# Supplementary material for: Polytypism of Compounds with the General Formula Cs{Al2[TP6O20]} (T = B, Al): OD (Order-Disorder) Description, Topological Features, and DFT-Calculations
Source: MDPI journal article supplement (doi:10.3390/min11070708), 2021-06-30
Supplement: s1 [file s1]

# Supplementary Materials

Table S1. Site coordinates (*xyz*) and site multiplicities (Mult.) for MDO2 polytype of compounds with the general formula  $\text{Cs}\{\text{Al}_2[\text{TP}_6\text{O}_{20}]\}$  ( $T = \text{Al, B}$ ) (standard setting:  $a = 11.815 \text{ \AA}$ ,  $b = 13.3160 \text{ \AA}$ ,  $c = 10.042 \text{ \AA}$ ; sp. gr.: *Pcnb*).

|     |        |        |        |   |
|-----|--------|--------|--------|---|
| Cs  | 0.5    | 0.25   | 0.2753 | 4 |
| M   | 0.2335 | 0.9682 | 0.7221 | 8 |
| P1  | 0.1979 | 0.6105 | 0.5074 | 8 |
| P2  | 0.7044 | 0.6749 | 0.4866 | 8 |
| P3  | 0.0360 | 0.5892 | 0.7191 | 8 |
| T4  | 0.5    | 0.75   | 0.3882 | 4 |
| O1  | 0.4189 | 0.9470 | 0.2161 | 8 |
| O2  | 0.3000 | 0.5550 | 0.6124 | 8 |
| O3  | 0.7800 | 0.6200 | 0.3600 | 8 |
| O4  | 0.7200 | 0.6200 | 0.6052 | 8 |
| O5  | 0.6104 | 0      | 0.2744 | 8 |
| O6  | 0.2000 | 0.5550 | 0.3830 | 8 |
| O7  | 0.4124 | 0.7937 | 0.4785 | 8 |
| O8  | 0.0755 | 0.6164 | 0.5690 | 8 |
| O9  | 0.2181 | 0.7203 | 0.4582 | 8 |
| O10 | 0.0554 | 0.6784 | 0.7916 | 8 |
