# Supplementary material for: Polytypism of Compounds with the General Formula Cs{Al2[TP6O20]} (T = B, Al): OD (Order-Disorder) Description, Topological Features, and DFT-Calculations
Source: MDPI journal article supplement (doi:10.3390/min11070708), 2021-06-30
Supplement: s1 [file s1]

**BORON**

**T=B MDO1**

9.90169950070000010.0000000000000000 0.0000000000000000  
0.0000000000000000 13.2108915245000147 0.0000000000000000  
0.0000000000000000 0.0000000000000000 12.0296198728000121

Cs B Al P O  
4 4 8 24 80

**Direct**

0.0076388533826953 0.0000000000000000 0.0000000000000000  
0.0076388533826953 0.5000000000000000 0.5000000000000000  
0.5076388533826952 0.5000000000000000 0.0000000000000000  
0.5076388533826952 0.0000000000000000 0.5000000000000000  
0.3870254541418365 0.0000000000000000 0.0000000000000000  
0.3870254541418365 0.5000000000000000 0.5000000000000000  
0.8870254541418365 0.5000000000000000 0.0000000000000000  
0.8870254541418365 0.0000000000000000 0.5000000000000000  
0.0487959049266278 0.2701869638081084 0.2270895107957996  
0.0487959049266278 0.7298130061918965 0.7729104592041972  
0.0487959049266278 0.2298130361918915 0.7270895407958028  
0.0487959049266278 0.7701869938081035 0.2729104892042006  
0.5487959309266228 0.7701869938081035 0.2270895107957996  
0.5487959309266228 0.2298130361918915 0.7729104592041972  
0.5487959309266228 0.7298130061918965 0.7270895407958028  
0.5487959309266228 0.2701869638081084 0.2729104892042006  
0.0589545951589294 0.1737811925599288 0.4624829667812624  
0.0589545951589294 0.8262188374400665 0.5375170632187402  
0.0589545951589294 0.3262188074400711 0.9624829367812598

0.0589545951589294 0.6737811625599335 0.0375170332187374  
0.5589545881589323 0.6737811625599335 0.4624829667812624  
0.5589545881589323 0.3262188074400711 0.5375170632187402  
0.5589545881589323 0.8262188374400665 0.9624829367812598  
0.5589545881589323 0.1737811925599288 0.0375170332187374  
0.2685426102732104 0.1294274000049335 0.3039195336018603  
0.2685426102732104 0.8705726299950686 0.6960804363981370  
0.2685426102732104 0.3705725999950664 0.8039195636018630  
0.2685426102732104 0.6294273700049314 0.1960804663981395  
0.7685426102732106 0.6294273700049314 0.3039195336018603  
0.7685426102732106 0.3705725999950664 0.6960804363981370  
0.7685426102732106 0.8705726299950686 0.8039195636018630  
0.7685426102732106 0.1294274000049335 0.1960804663981395  
0.3091817763359972 0.4213154095689449 0.2934906640643666  
0.3091817763359972 0.5786846204310573 0.7065093059356310  
0.3091817763359972 0.0786845904310550 0.7934906940643690  
0.3091817763359972 0.9213153795689427 0.2065093359356335  
0.8091817763359970 0.9213153795689427 0.2934906640643666  
0.8091817763359970 0.0786845904310550 0.7065093059356310  
0.8091817763359970 0.5786846204310574 0.7934906940643690  
0.8091817763359970 0.4213154095689449 0.2065093359356335  
0.4689560997540542 0.0791697934873797 0.0477774656290185  
0.4689560997540542 0.9208302145126209 0.9522225343709813  
0.4689560997540542 0.4208302145126211 0.5477774656290187  
0.4689560997540542 0.5791697854873791 0.4522225343709814  
0.9689561297540566 0.5791697854873791 0.0477774656290185  
0.9689561297540566 0.4208302145126211 0.9522225343709813  
0.9689561297540566 0.9208302145126209 0.5477774656290187  
0.9689561297540566 0.0791697934873797 0.4522225343709814

0.0783317632017115 0.2864424632542677 0.0765813954371244  
0.0783317632017115 0.7135575367457322 0.9234185745628803  
0.0783317632017115 0.2135575367457323 0.5765814254371197  
0.0783317632017115 0.7864424632542678 0.4234186045628754  
0.5783317562017074 0.7864424632542678 0.0765813954371244  
0.5783317562017074 0.2135575367457323 0.9234185745628803  
0.5783317562017074 0.7135575367457322 0.5765814254371197  
0.5783317562017074 0.2864424632542677 0.4234186045628754  
0.0136716331446191 0.2516909769672204 0.3795583634075576  
0.0136716331446191 0.7483090520327782 0.6204416365924430  
0.0136716331446191 0.2483090230327794 0.8795583634075570  
0.0136716331446191 0.7516909479672218 0.1204416365924426  
0.5136716611446214 0.7516909479672218 0.3795583634075576  
0.5136716611446214 0.2483090230327794 0.6204416365924430  
0.5136716611446214 0.7483090520327782 0.8795583634075570  
0.5136716611446214 0.2516909769672204 0.1204416365924426  
0.2088293518968565 0.1352372642928444 0.4269566365958604  
0.2088293518968565 0.8647627057071531 0.5730433934041420  
0.2088293518968565 0.3647627357071556 0.9269566065958580  
0.2088293518968565 0.6352372942928469 0.0730433634041395  
0.7088293668968548 0.6352372942928469 0.4269566365958604  
0.7088293668968548 0.3647627357071556 0.5730433934041420  
0.7088293668968548 0.8647627057071531 0.9269566065958580  
0.7088293668968548 0.1352372642928444 0.0730433634041395  
0.4021064341599235 0.1805164566330249 0.3069059574574554  
0.4021064341599235 0.8194835583669727 0.6930940425425443  
0.4021064341599235 0.3194835583669730 0.8069059574574557  
0.4021064341599235 0.6805164416330273 0.1930940425425441  
0.9021064341599234 0.6805164416330273 0.3069059574574554

0.9021064341599234 0.3194835583669730 0.6930940425425443  
0.9021064341599234 0.8194835583669727 0.8069059574574557  
0.9021064341599234 0.1805164566330249 0.1930940425425441  
0.1635101147708593 0.1574136645765372 0.2201769603286697  
0.1635101147708593 0.8425863204234654 0.7798230246713331  
0.1635101147708593 0.3425863204234650 0.7201769753286669  
0.1635101147708593 0.6574136795765346 0.2798230246713326  
0.6635101147708593 0.6574136795765346 0.2201769603286697  
0.6635101147708593 0.3425863204234650 0.7798230246713331  
0.6635101147708593 0.8425863204234654 0.7201769753286669  
0.6635101147708593 0.1574136645765372 0.2798230246713326  
0.2911396580017765 0.0110062758114938 0.2959200867726821  
0.2911396580017765 0.9889937521885083 0.7040799132273179  
0.2911396580017765 0.4889937221885060 0.7959200867726821  
0.2911396580017765 0.5110062478114918 0.2040799132273179  
0.7911396580017765 0.5110062478114918 0.2959200867726821  
0.7911396580017765 0.4889937221885060 0.7040799132273179  
0.7911396580017765 0.9889937521885082 0.7959200867726821  
0.7911396580017765 0.0110062758114938 0.2040799132273178  
0.2931701188608465 0.4643682628829985 0.4126330505246790  
0.2931701188608465 0.5356317371170015 0.5873669194753257  
0.2931701188608465 0.0356317371170014 0.9126330805246743  
0.2931701188608465 0.9643682628829985 0.0873669494753212  
0.7931701188608463 0.9643682628829985 0.4126330505246790  
0.7931701188608463 0.0356317371170014 0.5873669194753257  
0.7931701188608463 0.5356317371170015 0.9126330805246743  
0.7931701188608463 0.4643682628829985 0.0873669494753212  
0.1985530880365869 0.3486041355370054 0.2710330947095293  
0.1985530880365869 0.6513958644629947 0.7289668752904750

0.1985530880365869 0.1513958644629944 0.7710331247095250  
0.1985530880365869 0.8486041355370053 0.2289669052904708  
0.6985530730365901 0.8486041355370053 0.2710330947095292  
0.6985530730365901 0.1513958644629944 0.7289668752904750  
0.6985530730365901 0.6513958644629947 0.7710331247095249  
0.6985530730365901 0.3486041355370054 0.2289669052904708  
0.4500746872157269 0.3867504896931683 0.2706527059120433  
0.4500746872157269 0.6132495103068308 0.7293473230879624  
0.4500746872157269 0.1132495103068314 0.7706526769120376  
0.4500746872157270 0.8867504896931692 0.2293472940879566  
0.9500746572157249 0.8867504896931692 0.2706527059120433  
0.9500746572157249 0.1132495103068314 0.7293473230879624  
0.9500746572157249 0.6132495103068308 0.7706526769120376  
0.9500746572157249 0.3867504896931683 0.2293472940879566

#### T=B MDO2

11.7893165599689720 0.0000000000000000 0.0000000000000000  
0.0000000000000000 10.1608737704400856 0.0000000000000000  
0.0000000000000000 0.0000000000000000 13.4876323454888691

Cs Al P B O

4 8 24 4 80

Direct

0.5000000000000000 0.2233062234834165 0.2500000000000000  
0.5000000000000000 0.7766937465165877 0.7500000000000000  
0.0000000000000000 0.2766937765165834 0.7500000000000000  
0.0000000000000000 0.7233062534834122 0.2500000000000000  
0.2376120649226492 0.7383770076527993 0.9641723159049735  
0.7623879350773511 0.2616229923472002 0.0358276840950261  
0.2623879350773507 0.7616229923472007 0.4641723159049739

0.7376120649226489 0.2383770076527998 0.5358276840950265  
0.7623879350773511 0.7383770076527993 0.5358276840950265  
0.2376120649226492 0.2616229923472002 0.4641723159049739  
0.7376120649226487 0.7616229923472007 0.0358276840950261  
0.2623879350773507 0.2383770076527998 0.9641723159049735  
0.2074797433152917 0.5285286649746815 0.6071679610624995  
0.7925202566847082 0.4714713350253185 0.3928320389375011  
0.2925202566847084 0.9714713350253185 0.1071679610624988  
0.7074797433152918 0.0285286649746819 0.8928320389375005  
0.7925202566847082 0.5285286649746815 0.8928320389375005  
0.2074797433152917 0.4714713350253185 0.1071679610624988  
0.7074797433152918 0.9714713350253185 0.3928320389375012  
0.2925202566847084 0.0285286649746819 0.6071679610624994  
0.7076026744712243 0.4952653901506881 0.6776928366197328  
0.2923973255287756 0.5047345808493056 0.3223071633802678  
0.7923973255287757 0.0047346098493119 0.1776928366197321  
0.2076026744712242 0.9952654191506944 0.8223071633802672  
0.2923973255287756 0.4952653901506881 0.8223071633802672  
0.7076026744712243 0.5047345808493056 0.1776928366197321  
0.2076026744712242 0.0047346098493119 0.3223071633802678  
0.7923973255287757 0.9952654191506944 0.6776928366197328  
0.0386943086369901 0.7315540046102734 0.5880707496472051  
0.9613056763630128 0.2684459953897268 0.4119292503527951  
0.4613056763630121 0.7684459953897266 0.0880707496472052  
0.5386943236369872 0.2315540046102731 0.9119292503527949  
0.9613056763630128 0.7315540046102734 0.9119292503527949  
0.0386943086369901 0.2684459953897268 0.0880707496472052  
0.5386943236369872 0.7684459953897266 0.4119292503527952  
0.4613056763630121 0.2315540046102731 0.5880707496472051

0.5000000000000000 0.3903430860185789 0.7500000000000000  
0.5000000000000000 0.6096568839814250 0.2500000000000000  
0.0000000000000000 0.1096569139814211 0.2500000000000000  
0.0000000000000000 0.8903431160185750 0.7500000000000000  
0.4136224428735075 0.2336838115627250 0.9287835815123129  
0.5863775571264922 0.7663162184372772 0.0712164184876869  
0.0863775571264922 0.2663161884372746 0.4287835815123131  
0.9136224428735078 0.7336837815627228 0.5712164184876871  
0.5863775571264922 0.2336838115627250 0.5712164184876871  
0.4136224428735076 0.7663162184372772 0.4287835815123131  
0.9136224428735078 0.2663161884372746 0.0712164184876869  
0.0863775571264922 0.7336837815627228 0.9287835815123129  
0.2852719305481701 0.6416722969264737 0.5796737232028232  
0.7147280694518297 0.3583277030735263 0.4203262767971768  
0.2147280694518297 0.8583277030735263 0.0796737232028235  
0.7852719305481703 0.1416722969264735 0.9203262767971768  
0.7147280694518297 0.6416722969264737 0.9203262767971768  
0.2852719305481701 0.3583277030735263 0.0796737232028235  
0.7852719305481703 0.8583277030735263 0.4203262767971768  
0.2147280694518297 0.1416722969264735 0.5796737232028232  
0.7623624962838065 0.3906656197305026 0.6139468452544691  
0.2376375037161939 0.6093343802694973 0.3860531547455311  
0.7376375037161936 0.1093343802694972 0.1139468452544689  
0.2623624962838062 0.8906656197305027 0.8860531547455309  
0.2376375037161939 0.3906656197305026 0.8860531547455309  
0.7623624962838064 0.6093343802694973 0.1139468452544689  
0.2623624962838062 0.1093343802694972 0.3860531547455311  
0.7376375037161935 0.8906656197305027 0.6139468452544691  
0.7258402022181745 0.6367430605182206 0.6478976753867620

0.2741597977818259 0.3632569394817796 0.3521023246132384  
0.7741597977818255 0.8632569394817794 0.1478976753867615  
0.2258402022181741 0.1367430605182206 0.8521023246132380  
0.2741597977818259 0.6367430605182206 0.8521023246132380  
0.7258402022181745 0.3632569394817796 0.1478976753867615  
0.2258402022181741 0.8632569394817794 0.3521023246132384  
0.7741597977818255 0.1367430605182206 0.6478976753867620  
0.6076106517929261 0.2724786317206448 0.0016593339737566  
0.3923893482070744 0.7275213682793557 -0.0016593339737566  
0.8923893482070739 0.2275213682793555 0.5016593339737566  
0.1076106517929260 0.7724786317206443 0.4983406660262431  
0.3923893482070744 0.2724786317206448 0.4983406660262431  
0.6076106517929261 0.7275213682793557 0.5016593339737566  
0.1076106517929260 0.2275213682793555 -0.0016593339737566  
0.8923893482070739 0.7724786317206443 0.0016593339737566  
0.2045095100814192 0.4066397065049238 0.5452984747697854  
0.7954905049185784 0.5933602634950803 0.4547015252302143  
0.2954905049185783 0.0933602934950764 0.0452984747697855  
0.7045094950814216 0.9066397365049197 0.9547015252302146  
0.7954905049185784 0.4066397065049238 0.9547015252302146  
0.2045095100814192 0.5933602634950803 0.0452984747697855  
0.7045094950814216 0.0933602934950764 0.4547015252302143  
0.2954905049185783 0.9066397365049197 0.5452984747697854  
0.4225198168435904 0.4783212075054198 0.8050159787028784  
0.5774801831564099 0.5216787924945804 0.1949840212971219  
0.0774801831564097 0.0216787924945802 0.3050159787028781  
0.9225198168435902 0.9783212075054196 0.6949840212971216  
0.5774801831564098 0.4783212075054198 0.6949840212971216  
0.4225198168435904 0.5216787924945804 0.3050159787028781



0.9225198168435902 0.0216787924945802 0.1949840212971218  
0.0774801831564097 0.9783212075054196 0.8050159787028784  
0.0768847233352108 0.5803885924787404 0.6151237702388890  
0.9231152626647878 0.4196114075212585 0.3848762297611109  
0.4231152626647885 0.9196114075212596 0.1151237702388892  
0.5768847373352122 0.0803885924787414 0.8848762297611110  
0.9231152626647878 0.5803885924787404 0.8848762297611110  
0.0768847233352108 0.4196114075212585 0.1151237702388892  
0.5768847373352122 0.9196114075212596 0.3848762297611109  
0.4231152626647885 0.0803885924787414 0.6151237702388890  
0.2281205522971938 0.4755651681826031 0.7170121109462160  
0.7718794327028082 0.5244348618173921 0.2829878890537837  
0.2718794327028083 0.0244348318173970 0.2170121109462162  
0.7281205672971918 0.9755651381826079 0.7829878890537840  
0.7718794327028082 0.4755651681826031 0.7829878890537840  
0.2281205522971938 0.5244348618173921 0.2170121109462162  
0.7281205672971918 0.0244348318173970 0.2829878890537837  
0.2718794327028083 0.9755651381826079 0.7170121109462160  
0.0708410360114793 0.8104753030408756 0.6833685758323423  
0.9291589489885238 0.1895246969591247 0.3166314241676577  
0.4291589489885227 0.6895246969591244 0.1833685758323425  
0.5708410510114762 0.3104753030408753 0.8166314241676577  
0.9291589489885238 0.8104753030408756 0.8166314241676577  
0.0708410360114793 0.1895246969591247 0.1833685758323425  
0.5708410510114762 0.6895246969591244 0.3166314241676577  
0.4291589489885227 0.3104753030408753 0.6833685758323423

**T=B nonMDO 40**

11.8149995804000003 0.0000000000000000 0.0000000000000000

0.0000000000000000 10.0419998169000007 0.0000000000000000  
0.0000000000000000 0.0000000000000000 26.6299991608000006

Cs Al P B O

8 16 48 8 160

Direct

0.4922345739045069 0.2753392599469574 0.1192418248854233  
0.5077653960954908 0.7246607100530479 0.8807581751145763  
0.0077654260954932 0.7246607100530479 0.6192418248854237  
0.9922346039045092 0.2753392599469574 0.3807581751145768  
0.5077653960954908 0.7753392899469521 0.3807581751145768  
0.4922345739045069 0.2246607400530427 0.6192418248854237  
0.9922346039045092 0.2246607400530427 0.8807581751145763  
0.0077654260954932 0.7753392899469521 0.1192418248854233  
0.2365975524563227 0.7267072775651238 0.4830042179977794  
0.7634024475436768 0.2732927224348760 0.5169958120022232  
0.2634024475436776 0.2732927224348760 0.9830041879977768  
0.7365975524563232 0.7267072775651238 0.0169957820022205  
0.7634024475436768 0.2267072775651241 0.0169957820022205  
0.2365975524563227 0.7732927224348762 0.9830041879977768  
0.7365975524563232 0.7732927224348762 0.5169958120022232  
0.2634024475436776 0.2267072775651241 0.4830042179977794  
0.2647935679038161 0.7393971386692486 0.2359508342690242  
0.7352064320961843 0.2606028613307516 0.7640491807309735  
0.2352064320961838 0.2606028613307516 0.7359508192690265  
0.7647935679038157 0.7393971386692486 0.2640491807309736  
0.7352064320961843 0.2393971386692485 0.2640491807309736  
0.2647935679038161 0.7606028613307514 0.7359508192690265  
0.7647935679038157 0.7606028613307514 0.7640491807309735  
0.2352064320961838 0.2393971386692485 0.2359508342690242

0.2000319520576391 0.5063930437895698 0.3050998890555951  
0.7999680479423611 0.4936069562104302 0.6949001409444002  
0.2999680479423610 0.4936069562104302 0.8050998590555998  
0.7000319520576389 0.5063930437895698 0.1949001109444050  
0.7999680479423611 0.0063930437895698 0.1949001109444050  
0.2000319520576391 0.9936069562104302 0.8050998590555998  
0.7000319520576389 0.9936069562104302 0.6949001409444002  
0.2999680479423610 0.0063930437895698 0.3050998890555951  
0.7046450619364272 0.4810027706969404 0.3363382462126409  
0.2953549380635724 0.5189972003030532 0.6636617827873580  
0.7953549380635728 0.5189972003030532 0.8363382172126420  
0.2046450619364274 0.4810027706969404 0.1636617537873591  
0.2953549380635724 0.9810027996969468 0.1636617537873591  
0.7046450619364272 0.0189972293030594 0.8363382172126420  
0.2046450619364274 0.0189972293030594 0.6636617827873580  
0.7953549380635728 0.9810027996969468 0.3363382462126409  
0.7124031679514169 0.0441296929443936 0.4440125703410814  
0.2875968320485830 0.9558702850556121 0.5559874596589142  
0.7875968320485831 0.9558702850556121 0.9440125403410858  
0.2124031679514172 0.0441296929443936 0.0559874296589186  
0.2875968320485830 0.5441297149443879 0.0559874296589186  
0.7124031679514169 0.4558703150556072 0.9440125403410858  
0.2124031679514172 0.4558703150556072 0.5559874596589142  
0.7875968320485831 0.5441297149443879 0.4440125703410814  
0.0361258133227044 0.7187815360389088 0.2967396225022854  
0.9638741716772976 0.2812184639610908 0.7032603774977140  
0.4638741716772979 0.2812184639610908 0.7967396225022860  
0.5361258283227024 0.7187815360389088 0.2032603774977147  
0.9638741716772976 0.2187815360389089 0.2032603774977147

0.0361258133227044 0.7812184639610912 0.7967396225022860  
0.5361258283227024 0.7812184639610912 0.7032603774977140  
0.4638741716772979 0.2187815360389089 0.2967396225022854  
0.2878679625832383 0.4870436718377298 0.4112405488790734  
0.7121320374167620 0.5129562981622746 0.5887594221209284  
0.2121320374167618 0.5129562981622746 0.9112405778790716  
0.7878679625832380 0.4870436718377298 0.0887594511209266  
0.7121320374167620 0.9870437018377254 0.0887594511209266  
0.2878679625832383 0.0129563281622702 0.9112405778790716  
0.7878679625832380 0.0129563281622702 0.5887594221209284  
0.2121320374167618 0.9870437018377254 0.4112405488790734  
0.5388500714698353 0.2354899981105956 0.4624838346712901  
0.4611499285301646 0.7645099728894055 0.5375161653287098  
0.9611499285301647 0.7645099728894055 0.9624838346712902  
0.0388500714698354 0.2354899981105956 0.0375161653287100  
0.4611499285301646 0.7354900271105945 0.0375161653287100  
0.5388500714698353 0.2645100018894043 0.9624838346712902  
0.0388500714698354 0.2645100018894043 0.5375161653287098  
0.9611499285301647 0.7354900271105945 0.4624838346712901  
0.5005559792588734 0.3888707370239468 0.3783388340020210  
0.4994440207411266 0.6111292329760579 0.6216611659979793  
-0.0005559792588735 0.6111292329760579 0.8783388340020207  
0.0005559792588734 0.3888707370239468 0.1216611659979790  
0.4994440207411266 0.8888707670239421 0.1216611659979790  
0.5005559792588734 0.1111292629760533 0.8783388340020207  
0.0005559792588734 0.1111292629760533 0.6216611659979793  
-0.0005559792588735 0.8888707670239421 0.3783388340020210  
0.4153688176124684 0.2233104180517932 0.4717213291014924  
0.5846311823875319 0.7766896119482093 0.5282786708985081

0.0846311823875317 0.7766896119482093 0.9717213291014919  
0.9153688176124681 0.2233104180517932 0.0282786708985076  
0.5846311823875319 0.7233103880517907 0.0282786708985076  
0.4153688176124684 0.2766895819482069 0.9717213291014919  
0.9153688176124681 0.2766895819482069 0.5282786708985081  
0.0846311823875317 0.7233103880517907 0.4717213291014924  
0.2831401740767500 0.6160655012480880 0.2924652248318292  
0.7168598259232498 0.3839344987519124 0.7075348051681728  
0.2168598259232500 0.3839344987519124 0.7924651948318272  
0.7831401740767502 0.6160655012480880 0.2075347751681705  
0.7168598259232498 0.1160655012480877 0.2075347751681705  
0.2831401740767500 0.8839344987519120 0.7924651948318272  
0.7831401740767502 0.8839344987519120 0.7075348051681728  
0.2168598259232500 0.1160655012480877 0.2924652248318292  
0.9134929520052032 0.7064934879844019 0.2836311336093906  
0.0865070779947993 0.2935065120155980 0.7163688363906072  
0.5865070479947968 0.2935065120155980 0.7836311636093928  
0.4134929220052007 0.7064934879844019 0.2163688663906095  
0.0865070779947993 0.2064934879844020 0.2163688663906095  
0.9134929520052032 0.7935065120155981 0.7836311636093928  
0.4134929220052007 0.7935065120155981 0.7163688363906072  
0.5865070479947968 0.2064934879844020 0.2836311336093906  
0.7870577895909834 0.1605478297421546 0.4580056266364854  
0.2129422104090171 0.8394521552578476 0.5419943433635191  
0.7129422104090166 0.8394521552578476 0.9580056566364809  
0.2870577895909829 0.1605478297421546 0.0419943733635144  
0.2129422104090171 0.6605478447421524 0.0419943733635144  
0.7870577895909834 0.3394521552578478 0.9580056566364809  
0.2870577895909829 0.3394521552578478 0.5419943433635191

0.7129422104090166 0.6605478447421524 0.4580056266364854  
0.7568787728597364 0.3495645798594070 0.3209707535305703  
0.2431212271402635 0.6504354201405927 0.6790292764694249  
0.7431212271402636 0.6504354201405927 0.8209707235305751  
0.2568787728597365 0.3495645798594070 0.1790292464694296  
0.2431212271402635 0.8495645798594073 0.1790292464694296  
0.7568787728597364 0.1504354201405928 0.8209707235305751  
0.2568787728597365 0.1504354201405928 0.6790292764694249  
0.7431212271402636 0.8495645798594073 0.3209707535305703  
0.7141527103200721 0.5967833605385146 0.3011863034797142  
0.2858472896799275 0.4032166394614857 0.6988136965202859  
0.7858472896799279 0.4032166394614857 0.8011863034797141  
0.2141527103200728 0.5967833605385146 0.1988136965202858  
0.2858472896799275 0.0967833605385144 0.1988136965202858  
0.7141527103200721 0.9032166394614854 0.8011863034797141  
0.2141527103200728 0.9032166394614854 0.6988136965202859  
0.7858472896799279 0.0967833605385144 0.3011863034797142  
0.6058357889432647 0.2776803991732829 0.5082460862976642  
0.3941642110567350 0.7223196008267166 0.4917539137023357  
0.8941642110567353 0.7223196008267166 0.0082460862976643  
0.1058357889432650 0.2776803991732829 0.9917539137023358  
0.3941642110567350 0.7776803991732834 0.9917539137023358  
0.6058357889432647 0.2223196008267170 0.0082460862976643  
0.1058357889432650 0.2223196008267170 0.4917539137023357  
0.8941642110567353 0.7776803991732834 0.5082460862976642  
0.1848461357156944 0.3838153162053515 0.2735236365912444  
0.8151538642843056 0.6161846537946530 0.7264763634087553  
0.3151538642843056 0.6161846537946530 0.7735236365912447  
0.6848461357156944 0.3838153162053515 0.2264763634087554

0.8151538642843056 0.8838153462053470 0.2264763634087554  
0.1848461357156944 0.1161846837946484 0.7735236365912447  
0.6848461357156944 0.1161846837946484 0.7264763634087553  
0.3151538642843056 0.8838153462053470 0.2735236365912444  
0.4176462442619073 0.4811023967268613 0.4010930105482435  
0.5823537557380927 0.5188976032731387 0.5989069594517613  
0.0823537557380927 0.5188976032731387 0.9010930405482387  
0.9176462442619073 0.4811023967268613 0.0989069894517566  
0.5823537557380927 0.9811023967268613 0.0989069894517566  
0.4176462442619073 0.0188976032731386 0.9010930405482387  
0.9176462442619073 0.0188976032731386 0.5989069594517613  
0.0823537557380927 0.9811023967268613 0.4010930105482435  
0.0743296968764952 0.5666469726485011 0.3106759954116476  
0.9256702891235039 0.4333530273514982 0.6893240045883529  
0.4256702891235037 0.4333530273514982 0.8106759954116471  
0.5743297108764961 0.5666469726485011 0.1893240045883526  
0.9256702891235039 0.0666469726485017 0.1893240045883526  
0.0743296968764952 0.9333530273514989 0.8106759954116471  
0.5743297108764961 0.9333530273514989 0.6893240045883529  
0.4256702891235037 0.0666469726485017 0.3106759954116476  
0.5761912689837496 0.4763434734517766 0.3496311188560138  
0.4238087310162505 0.5236565565482186 0.6503689111439815  
0.9238087310162504 0.5236565565482186 0.8496310888560185  
0.0761912689837494 0.4763434734517766 0.1503688811439862  
0.4238087310162505 0.9763434434517814 0.1503688811439862  
0.5761912689837496 0.0236565265482235 0.8496310888560185  
0.0761912689837494 0.0236565265482235 0.6503689111439815  
0.9238087310162504 0.9763434434517814 0.3496311188560138  
0.7226805562490535 0.9153331380273712 0.4712895708252403

0.2773194437509469 0.0846668699726295 0.5287104291747590  
0.7773194437509465 0.0846668699726295 0.9712895708252410  
0.2226805562490533 0.9153331380273712 0.0287104291747595  
0.2773194437509469 0.4153331380273710 0.0287104291747595  
0.7226805562490535 0.5846668619726288 0.9712895708252410  
0.2226805562490533 0.5846668619726288 0.5287104291747590  
0.7773194437509465 0.4153331380273710 0.4712895708252403  
0.2235619762330176 0.4472563338321788 0.3596408370793306  
0.7764380087669844 0.5527436961678166 0.6403591629206686  
0.2764380087669845 0.5527436961678166 0.8596408370793314  
0.7235619912330156 0.4472563338321788 0.1403591629206692  
0.7764380087669844 0.9472563038321834 0.1403591629206692  
0.2235619762330176 0.0527436661678212 0.8596408370793314  
0.7235619912330156 0.0527436661678212 0.6403591629206686  
0.2764380087669845 0.9472563038321834 0.3596408370793306  
0.2583347143860958 0.6294017017635630 0.4235226163403864  
0.7416652556139012 0.3705982982364374 0.5764773836596135  
0.2416652856139042 0.3705982982364374 0.9235226163403865  
0.7583347443860988 0.6294017017635630 0.0764773836596135  
0.7416652556139012 0.1294017017635629 0.0764773836596135  
0.2583347143860958 0.8705982982364370 0.9235226163403865  
0.7583347443860988 0.8705982982364370 0.5764773836596135  
0.2416652856139042 0.1294017017635629 0.4235226163403864  
0.2428759201625445 0.3843344849277221 0.4469542006518171  
0.7571241098374508 0.6156654850722756 0.5530457993481830  
0.2571240798374555 0.6156654850722756 0.9469542006518170  
0.7428758901625492 0.3843344849277222 0.0530457993481830  
0.7571241098374508 0.8843345149277244 0.0530457993481830  
0.2428759201625445 0.1156655150722777 0.9469542006518170



0.7428758901625492 0.1156655150722777 0.5530457993481830  
0.2571240798374555 0.8843345149277244 0.4469542006518171  
0.5801964566068291 0.0860431783772506 0.4466169538883777  
0.4198035433931709 0.9139568146227526 0.5533830761116248  
0.9198035433931709 0.9139568146227526 0.9466169238883752  
0.0801964566068292 0.0860431783772506 0.0533830461116221  
0.4198035433931709 0.5860431853772474 0.0533830461116221  
0.5801964566068291 0.4139568146227524 0.9466169238883752  
0.0801964566068292 0.4139568146227524 0.5533830761116248  
0.9198035433931709 0.5860431853772474 0.4466169538883777  
0.1121610361621953 0.7720121224951150 0.2554520469569666  
0.8878389408378063 0.2279878775048855 0.7445479830430358  
0.3878389708378088 0.2279878775048855 0.7554520169569642  
0.6121610591621937 0.7720121224951149 0.2445479530430334  
0.8878389408378063 0.2720121224951146 0.2445479530430334  
0.1121610361621953 0.7279878775048850 0.7554520169569642  
0.6121610591621937 0.7279878775048850 0.7445479830430358  
0.3878389708378088 0.2720121224951146 0.2554520469569666  
0.0593048905207767 0.7926714376917134 0.3472608078670909  
0.9406950944792255 0.2073285623082868 0.6527391621329139  
0.4406950944792258 0.2073285623082868 0.8472608378670861  
0.5593049055207745 0.7926714376917134 0.1527391921329089  
0.9406950944792255 0.2926714376917131 0.1527391921329089  
0.0593048905207767 0.7073285623082866 0.8472608378670861  
0.5593049055207745 0.7073285623082866 0.6527391621329139  
0.4406950944792258 0.2926714376917131 0.3472608078670909  
0.5701861077390430 0.3250074568176193 0.4168293023460932  
0.4298138922609570 0.6749925431823808 0.5831706976539068  
0.9298138922609570 0.6749925431823808 0.9168293023460932

0.0701861077390430 0.3250074568176193 0.0831706976539067  
0.4298138922609570 0.8250074568176192 0.0831706976539067  
0.5701861077390430 0.1749925431823809 0.9168293023460932  
0.0701861077390430 0.1749925431823809 0.5831706976539068  
0.9298138922609570 0.8250074568176192 0.4168293023460932  
0.7780974725065656 0.5205419809569161 0.3852121530096979  
0.2219025274934347 0.4794580190430840 0.6147878769902977  
0.7219025274934344 0.4794580190430840 0.8852121230097023  
0.2780974725065654 0.5205419809569161 0.1147878469903023  
0.2219025274934347 0.0205419809569159 0.1147878469903023  
0.7780974725065656 0.9794580190430839 0.8852121230097023  
0.2780974725065654 0.9794580190430839 0.6147878769902977  
0.7219025274934344 0.0205419809569159 0.3852121530096979

## ALUMINUM

T=Al MDO1

10.0047998428000007 0.0000000000000000 0.0000000000000000  
0.0000000000000000 13.3008003235000007 0.0000000000000000  
0.0000000000000000 0.0000000000000000 12.1697998047000002

Cs Al P O

4 12 24 80

Direct

-0.0014333853735200 -0.0000000000000000 -0.0000000000000000  
-0.0014333853735200 0.5000000000000000 0.5000000000000000  
0.4985666146264798 0.5000000000000000 -0.0000000000000000  
0.4985666146264798 -0.0000000000000000 0.5000000000000000  
0.3777533884650779 -0.0000000000000000 -0.0000000000000000  
0.3777533884650779 0.5000000000000000 0.5000000000000000  
0.8777533884650779 0.5000000000000000 -0.0000000000000000

0.8777533884650779 -0.0000000000000000 0.5000000000000000  
0.0498316863545526 0.2707723310786697 0.2208157734474213  
0.0498316863545526 0.7292276389213351 0.7791841965525765  
0.0498316863545526 0.2292276689213303 0.7208158034474235  
0.0498316863545526 0.7707723610786649 0.2791842265525787  
0.5498317123545478 0.7707723610786649 0.2208157734474213  
0.5498317123545478 0.2292276689213303 0.7791841965525765  
0.5498317123545478 0.7292276389213351 0.7208158034474235  
0.5498317123545478 0.2707723310786697 0.2791842265525787  
0.0649733810764079 0.1899909066677407 0.4576588747131808  
0.0649733810764079 0.8100091233322549 0.5423411552868213  
0.0649733810764079 0.3100090933322594 0.9576588447131787  
0.0649733810764079 0.6899908766677451 0.0423411252868191  
0.5649733740764108 0.6899908766677451 0.4576588747131808  
0.5649733740764108 0.3100090933322594 0.5423411552868213  
0.5649733740764108 0.8100091233322549 0.9576588447131787  
0.5649733740764108 0.1899909066677407 0.0423411252868191  
0.2693125258436461 0.1314053544719476 0.3053119122323177  
0.2693125258436461 0.8685946755280546 0.6946880577676798  
0.2693125258436461 0.3685946455280524 0.8053119422323202  
0.2693125258436461 0.6314053244719454 0.1946880877676824  
0.7693125258436460 0.6314053244719454 0.3053119122323177  
0.7693125258436460 0.3685946455280524 0.6946880577676798  
0.7693125258436460 0.8685946755280546 0.8053119422323202  
0.7693125258436460 0.1314053544719476 0.1946880877676824  
0.3048388178232060 0.4213984963804110 0.2798955272451228  
0.3048388178232060 0.5786015336195915 0.7201044427548741  
0.3048388178232060 0.0786015036195890 0.7798955572451259  
0.3048388178232060 0.9213984663804085 0.2201044727548771

0.8048388178232059 0.9213984663804085 0.2798955272451228  
0.8048388178232059 0.0786015036195890 0.7201044427548741  
0.8048388178232059 0.5786015336195915 0.7798955572451259  
0.8048388178232059 0.4213984963804110 0.2201044727548771  
0.4758162995913799 0.0961921122525809 0.0523052517161759  
0.4758162995913799 0.9038078957474198 0.9476947482838244  
0.4758162995913799 0.4038078957474197 0.5523052517161756  
0.4758162995913799 0.5961921042525802 0.4476947482838239  
0.9758163295913824 0.5961921042525802 0.0523052517161759  
0.9758163295913824 0.4038078957474197 0.9476947482838244  
0.9758163295913824 0.9038078957474198 0.5523052517161756  
0.9758163295913824 0.0961921122525809 0.4476947482838239  
0.0736194518443646 0.2667267671692923 0.0709350109294656  
0.0736194518443646 0.7332732328307077 0.9290649590705391  
0.0736194518443646 0.2332732328307078 0.5709350409294609  
0.0736194518443646 0.7667267671692923 0.4290649890705343  
0.5736194448443606 0.7667267671692923 0.0709350109294656  
0.5736194448443606 0.2332732328307078 0.9290649590705391  
0.5736194448443606 0.7332732328307077 0.5709350409294609  
0.5736194448443606 0.2667267671692923 0.4290649890705343  
0.0272969438453778 0.2696546793752561 0.3739790858937889  
0.0272969438453778 0.7303453496247433 0.6260209141062112  
0.0272969438453778 0.2303453206247442 0.8739790858937888  
0.0272969438453778 0.7696546503752567 0.1260209141062112  
0.5272969718453802 0.7696546503752567 0.3739790858937889  
0.5272969718453802 0.2303453206247442 0.6260209141062112  
0.5272969718453802 0.7303453496247433 0.8739790858937888  
0.5272969718453802 0.2696546793752561 0.1260209141062112  
0.2169878467577174 0.1503427286121529 0.4293780367756134

0.2169878467577174 0.8496572413878448 0.5706219932243891  
0.2169878467577174 0.3496572713878471 0.9293780067756109  
0.2169878467577174 0.6503427586121552 0.0706219632243863  
0.7169878617577153 0.6503427586121552 0.4293780367756134  
0.7169878617577153 0.3496572713878471 0.5706219932243891  
0.7169878617577153 0.8496572413878448 0.9293780067756109  
0.7169878617577153 0.1503427286121529 0.0706219632243863  
0.4012852142938530 0.1829741302556287 0.2950685545123920  
0.4012852142938530 0.8170258847443688 0.7049314454876081  
0.4012852142938530 0.3170258847443689 0.7950685545123919  
0.4012852142938530 0.6829741152556312 0.2049314454876081  
0.9012852142938528 0.6829741152556312 0.2950685545123919  
0.9012852142938528 0.3170258847443689 0.7049314454876081  
0.9012852142938528 0.8170258847443688 0.7950685545123919  
0.9012852142938528 0.1829741302556287 0.2049314454876081  
0.1579604706574139 0.1509285153891530 0.2247650433582086  
0.1579604706574139 0.8490714696108491 0.7752349416417937  
0.1579604706574139 0.3490714696108492 0.7247650583582063  
0.1579604706574139 0.6509285303891509 0.2752349416417939  
0.6579604706574140 0.6509285303891509 0.2247650433582086  
0.6579604706574140 0.3490714696108492 0.7752349416417937  
0.6579604706574140 0.8490714696108491 0.7247650583582063  
0.6579604706574140 0.1509285153891530 0.2752349416417939  
0.2963332942825764 0.0125084826217755 0.3097042187089357  
0.2963332942825764 0.9874915453782270 0.6902957812910638  
0.2963332942825764 0.4874915153782241 0.8097042187089362  
0.2963332942825764 0.5125084546217730 0.1902957812910642  
0.7963332942825763 0.5125084546217730 0.3097042187089357  
0.7963332942825763 0.4874915153782241 0.6902957812910638

0.7963332942825763 0.9874915453782270 0.8097042187089362  
0.7963332942825763 0.0125084826217755 0.1902957812910642  
0.2652681922945775 0.4653952428060094 0.3940228865268828  
0.2652681922945775 0.5346047571939908 0.6059770834731218  
0.2652681922945775 0.0346047571939907 0.8940229165268782  
0.2652681922945775 0.9653952428060092 0.1059771134731171  
0.7652681922945774 0.9653952428060092 0.3940228865268828  
0.7652681922945774 0.0346047571939907 0.6059770834731218  
0.7652681922945774 0.5346047571939908 0.8940229165268782  
0.7652681922945774 0.4653952428060094 0.1059771134731171  
0.2084290521708536 0.3446036717304173 0.2380635801518439  
0.2084290521708536 0.6553963282695825 0.7619363898481607  
0.2084290521708536 0.1553963282695824 0.7380636101518393  
0.2084290521708536 0.8446036717304175 0.2619364198481562  
0.7084290371708558 0.8446036717304175 0.2380635801518439  
0.7084290371708558 0.1553963282695824 0.7619363898481607  
0.7084290371708558 0.6553963282695825 0.7380636101518393  
0.7084290371708558 0.3446036717304173 0.2619364198481562  
0.4510368111182864 0.3908375686051115 0.2830083274538441  
0.4510368111182864 0.6091624313948888 0.7169917015461618  
0.4510368111182864 0.1091624313948886 0.7830082984538382  
0.4510368111182864 0.8908375686051112 0.2169916725461560  
0.9510367811182843 0.8908375686051112 0.2830083274538441  
0.9510367811182843 0.1091624313948886 0.7169917015461618  
0.9510367811182843 0.6091624313948888 0.7830082984538382  
0.9510367811182843 0.3908375686051115 0.2169916725461560

**T=AI MDO2**

11.9479368813616560 0.0000000000000000 0.0000000000000000

0.0000000000000000 10.3156527514948149 0.0000000000000000  
0.0000000000000000 0.0000000000000000 13.6593088517548313

Cs Al P O

4 12 24 80

Direct

0.5000000000000000 0.2304633214232164 0.2500000000000000  
0.5000000000000000 0.7695366485767888 0.7500000000000000  
-0.0000000000000000 0.2695366785767838 0.7500000000000000  
-0.0000000000000000 0.7304633514232112 0.2500000000000000  
0.2310653727877420 0.7439922918540666 0.9681079582342523  
0.7689346272122578 0.2560077081459334 0.0318920417657474  
0.2689346272122579 0.7560077081459334 0.4681079582342528  
0.7310653727877422 0.2439922918540665 0.5318920417657477  
0.7689346272122578 0.7439922918540666 0.5318920417657477  
0.2310653727877420 0.2560077081459334 0.4681079582342528  
0.7310653727877421 0.7560077081459334 0.0318920417657474  
0.2689346272122579 0.2439922918540665 0.9681079582342523  
0.5000000000000000 0.3799856446108245 0.7500000000000000  
0.5000000000000000 0.6200143253891803 0.2500000000000000  
-0.0000000000000000 0.1200143553891757 0.2500000000000000  
-0.0000000000000000 0.8799856746108197 0.7500000000000000  
0.2030918627468142 0.5166331293488322 0.6071055775867845  
0.7969081372531859 0.4833668706511677 0.3928944224132151  
0.2969081372531857 0.9833668706511678 0.1071055775867848  
0.7030918627468141 0.0166331293488322 0.8928944224132155  
0.7969081372531859 0.5166331293488322 0.8928944224132155  
0.2030918627468142 0.4833668706511677 0.1071055775867848  
0.7030918627468141 0.9833668706511678 0.3928944224132151  
0.2969081372531857 0.0166331293488322 0.6071055775867845

0.7198666859125760 0.4946987576714559 0.6753114067913075  
0.2801333140874243 0.5053012133285377 0.3246885932086927  
0.7801333140874240 0.0053012423285439 0.1753114067913072  
0.2198666859125758 0.9946987866714623 0.8246885932086925  
0.2801333140874243 0.4946987576714559 0.8246885932086925  
0.7198666859125760 0.5053012133285377 0.1753114067913072  
0.2198666859125758 0.0053012423285439 0.3246885932086927  
0.7801333140874240 0.9946987866714623 0.6753114067913075  
0.0451305612350436 0.7207632057354100 0.5746720444871659  
0.9548694237649591 0.2792367942645903 0.4253279555128342  
0.4548694237649585 0.7792367942645900 0.0746720444871658  
0.5451305762350409 0.2207632057354101 0.9253279555128341  
0.9548694237649591 0.7207632057354100 0.9253279555128341  
0.0451305612350436 0.2792367942645903 0.0746720444871658  
0.5451305762350409 0.7792367942645900 0.4253279555128342  
0.4548694237649585 0.2207632057354101 0.5746720444871659  
0.4219057280003525 0.2389426529957032 0.9409080287009611  
0.5780942719996480 0.7610573770042994 0.0590919712990387  
0.0780942719996477 0.2610573470042968 0.4409080287009612  
0.9219057280003520 0.7389426229957006 0.5590919712990389  
0.5780942719996480 0.2389426529957032 0.5590919712990389  
0.4219057280003525 0.7610573770042994 0.4409080287009612  
0.9219057280003520 0.2610573470042968 0.0590919712990387  
0.0780942719996477 0.7389426229957006 0.9409080287009611  
0.2834454551492274 0.6202720446172080 0.5708199593131186  
0.7165545448507723 0.3797279553827926 0.4291800406868815  
0.2165545448507724 0.8797279553827920 0.0708199593131184  
0.7834454551492277 0.1202720446172075 0.9291800406868814  
0.7165545448507723 0.6202720446172080 0.9291800406868814



0.2834454551492274 0.3797279553827926 0.0708199593131184  
0.7834454551492277 0.8797279553827920 0.4291800406868815  
0.2165545448507724 0.1202720446172075 0.5708199593131186  
0.7602696180646275 0.3725397405042884 0.6261845214437071  
0.2397303819353728 0.6274602594957116 0.3738154785562936  
0.7397303819353725 0.1274602594957115 0.1261845214437065  
0.2602696180646271 0.8725397405042884 0.8738154785562929  
0.2397303819353728 0.3725397405042883 0.8738154785562929  
0.7602696180646275 0.6274602594957116 0.1261845214437065  
0.2602696180646271 0.1274602594957115 0.3738154785562936  
0.7397303819353725 0.8725397405042884 0.6261845214437071  
0.7480284672268441 0.6207349149029201 0.6281042116809453  
0.2519715327731559 0.3792650850970798 0.3718957883190552  
0.7519715327731559 0.8792650850970799 0.1281042116809449  
0.2480284672268443 0.1207349149029201 0.8718957883190547  
0.2519715327731559 0.6207349149029201 0.8718957883190547  
0.7480284672268441 0.3792650850970798 0.1281042116809449  
0.2480284672268443 0.8792650850970799 0.3718957883190552  
0.7519715327731559 0.1207349149029201 0.6281042116809453  
0.6135627608439774 0.2624887172522167 0.0125982024389961  
0.3864372391560220 0.7375112827477837 -0.0125982024389961  
0.8864372391560226 0.2375112827477835 0.5125982024389959  
0.1135627608439778 0.7624887172522163 0.4874017975610038  
0.3864372391560220 0.2624887172522167 0.4874017975610038  
0.6135627608439774 0.7375112827477837 0.5125982024389959  
0.1135627608439778 0.2375112827477835 -0.0125982024389961  
0.8864372391560226 0.7624887172522163 0.0125982024389961  
0.2087021785153129 0.3820063321896337 0.5660000121907719  
0.7912978364846844 0.6179936378103706 0.4339999878092284

0.2912978364846847 0.1179936678103664 0.0660000121907718  
0.7087021635153156 0.8820063621896294 0.9339999878092281  
0.7912978364846844 0.3820063321896337 0.9339999878092281  
0.2087021785153129 0.6179936378103706 0.0660000121907718  
0.7087021635153156 0.1179936678103664 0.4339999878092284  
0.2912978364846847 0.8820063621896294 0.5660000121907719  
0.4069078260050759 0.4913656767034817 0.8014436512401101  
0.5930921739949243 0.5086343232965186 0.1985563487598898  
0.0930921739949241 0.0086343232965185 0.3014436512401102  
0.9069078260050757 -0.0086343232965184 0.6985563487598899  
0.5930921739949243 0.4913656767034817 0.6985563487598899  
0.4069078260050759 0.5086343232965186 0.3014436512401101  
0.9069078260050757 0.0086343232965185 0.1985563487598898  
0.0930921739949241 -0.0086343232965184 0.8014436512401101  
0.0746770967836102 0.5666000964465300 0.5937433550536932  
0.9253228892163887 0.4333999035534702 0.4062566449463068  
0.4253228892163887 0.9333999035534700 0.0937433550536933  
0.5746771107836114 0.0666000964465299 0.9062566449463068  
0.9253228892163887 0.5666000964465300 0.9062566449463068  
0.0746770967836102 0.4333999035534701 0.0937433550536933  
0.5746771107836113 0.9333999035534700 0.4062566449463068  
0.4253228892163887 0.0666000964465299 0.5937433550536932  
0.2096825552513516 0.4971074652804047 0.7224324942762107  
0.7903174297486509 0.5028925647195909 0.2775675057237897  
0.2903174297486509 0.0028925347195955 0.2224324942762105  
0.7096825702513491 0.9971074352804091 0.7775675057237893  
0.7903174297486509 0.4971074652804047 0.7775675057237893  
0.2096825552513516 0.5028925647195909 0.2224324942762105  
0.7096825702513491 0.0028925347195955 0.2775675057237897

0.2903174297486509 0.9971074352804091 0.7224324942762107  
0.0828945288785843 0.7863168581528099 0.6715776466941612  
0.9171054561214179 0.2136831418471897 0.3284223533058389  
0.4171054561214181 0.7136831418471901 0.1715776466941613  
0.5828945438785821 0.2863168581528102 0.8284223533058388  
0.9171054561214179 0.7863168581528099 0.8284223533058388  
0.0828945288785843 0.2136831418471897 0.1715776466941613  
0.5828945438785821 0.7136831418471901 0.3284223533058389  
0.4171054561214181 0.2863168581528102 0.6715776466941612

**T=Al nonMDO 40**

12.2217054873491158 0.0000000000000000 0.0000000000000000  
-0.0000000000000000 10.1759714017445919 0.0000000000000000  
0.0000000000000000 0.0000000000000000 26.9351167516167678

Cs Al P O

8 24 48 160

Direct

0.4898195272704562 0.2865192225688530 0.1210311552858281  
0.5101804427295420 0.7134807474311516 0.8789688447141712  
0.0101804727295441 0.7134807474311516 0.6210311552858288  
0.9898195572704580 0.2865192225688530 0.3789688447141717  
0.5101804427295420 0.7865192525688484 0.3789688447141717  
0.4898195272704562 0.2134807774311470 0.6210311552858288  
0.9898195572704580 0.2134807774311470 0.8789688447141712  
0.0101804727295441 0.7865192525688484 0.1210311552858281  
0.2268168581988061 0.7330698623524680 0.4864754850894954  
0.7731831418011941 0.2669301376475314 0.5135245449105065  
0.2731831418011940 0.2669301376475314 0.9864754550894935  
0.7268168581988059 0.7330698623524680 0.0135245149105046

0.7731831418011941 0.2330698623524683 0.0135245149105046  
0.2268168581988061 0.7669301376475320 0.9864754550894935  
0.7268168581988059 0.7669301376475320 0.5135245449105065  
0.2731831418011940 0.2330698623524683 0.4864754850894954  
0.2734475997988073 0.7389628324658871 0.2360506892007183  
0.7265524002011935 0.2610371675341129 0.7639493257992794  
0.2265524002011930 0.2610371675341129 0.7360506742007206  
0.7734475997988065 0.7389628324658871 0.2639493257992795  
0.7265524002011935 0.2389628324658874 0.2639493257992795  
0.2734475997988073 0.7610371675341129 0.7360506742007206  
0.7734475997988065 0.7610371675341129 0.7639493257992794  
0.2265524002011930 0.2389628324658874 0.2360506892007183  
0.4979616344608383 0.4031646851872598 0.3755537157959576  
0.5020383655391615 0.5968352848127456 0.6244462842040429  
0.0020383655391617 0.5968352848127456 0.8755537157959571  
0.9979616344608385 0.4031646851872598 0.1244462842040423  
0.5020383655391615 0.9031647151872544 0.1244462842040423  
0.4979616344608383 0.0968353148127406 0.8755537157959571  
0.9979616344608385 0.0968353148127406 0.6244462842040429  
0.0020383655391617 0.9031647151872544 0.3755537157959576  
0.1974100739635256 0.5119684426038255 0.3055148571695566  
0.8025899260364739 0.4880315573961750 0.6944851728304382  
0.3025899260364744 0.4880315573961750 0.8055148271695618  
0.6974100739635261 0.5119684426038255 0.1944851428304431  
0.8025899260364739 0.0119684426038251 0.1944851428304431  
0.1974100739635256 0.9880315573961745 0.8055148271695618  
0.6974100739635261 0.9880315573961745 0.6944851728304382  
0.3025899260364744 0.0119684426038251 0.3055148571695566  
0.721604884885883 0.4856468363863989 0.3381380679452043

0.2783951151114125 0.5143531346135946 0.6618619610547954  
0.7783951151114117 0.5143531346135946 0.8381380389452046  
0.2216048848885878 0.4856468363863989 0.1618619320547960  
0.2783951151114125 0.9856468653864054 0.1618619320547960  
0.7216048848885883 0.0143531636136011 0.8381380389452046  
0.2216048848885878 0.0143531636136011 0.6618619610547954  
0.7783951151114117 0.9856468653864054 0.3381380679452043  
0.7024155909425516 0.0382361536535838 0.4439544185564097  
0.2975844090574489 0.9617638243464209 0.5560456114435860  
0.7975844090574484 0.9617638243464209 0.9439543885564140  
0.2024155909425510 0.0382361536535838 0.0560455814435906  
0.2975844090574489 0.5382361756535791 0.0560455814435906  
0.7024155909425516 0.4617638543464169 0.9439543885564140  
0.2024155909425510 0.4617638543464169 0.5560456114435860  
0.7975844090574484 0.5382361756535791 0.4439544185564097  
0.0418294804473392 0.7173235797000869 0.2840894833258984  
0.9581705045526633 0.2826764202999134 0.7159105166741017  
0.4581705045526631 0.2826764202999134 0.7840894833258983  
0.5418294954473367 0.7173235797000869 0.2159105166741019  
0.9581705045526633 0.2173235797000867 0.2159105166741019  
0.0418294804473392 0.7826764202999131 0.7840894833258983  
0.5418294954473367 0.7826764202999131 0.7159105166741017  
0.4581705045526631 0.2173235797000867 0.2840894833258984  
0.2756363225860790 0.5001211894366078 0.4115712332956743  
0.7243636774139214 0.4998787805633976 0.5884287377043265  
0.2243636774139212 0.4998787805633976 0.9115712622956735  
0.7756363225860786 0.5001211894366078 0.0884287667043257  
0.7243636774139215 0.0001212194366024 0.0884287667043257  
0.2756363225860790 -0.0001211894366074 0.9115712622956735

0.7756363225860786 -0.0001211894366074 0.5884287377043265  
0.2243636774139212 0.0001212194366022 0.4115712332956743  
0.5412575241971879 0.2303402346430747 0.4706376325538634  
0.4587424758028128 0.7696597363569261 0.5293623674461364  
0.9587424758028121 0.7696597363569261 0.9706376325538636  
0.0412575241971872 0.2303402346430747 0.0293623674461365  
0.4587424758028128 0.7303402636430739 0.0293623674461365  
0.5412575241971879 0.2696597653569253 0.9706376325538636  
0.0412575241971872 0.2696597653569253 0.5293623674461364  
0.9587424758028121 0.7303402636430739 0.4706376325538634  
0.4250327683381313 0.2261883472391576 0.4884457901699979  
0.5749672316618687 0.7738116827608453 0.5115542098300015  
0.0749672316618688 0.7738116827608453 0.9884457901699985  
0.9250327683381313 0.2261883472391576 0.0115542098300019  
0.5749672316618687 0.7261883172391548 0.0115542098300019  
0.4250327683381313 0.2738116527608424 0.9884457901699985  
0.9250327683381313 0.2738116527608424 0.5115542098300015  
0.0749672316618688 0.7261883172391548 0.4884457901699979  
0.2757206011514139 0.6242701833413461 0.2960399061493423  
0.7242793988485861 0.3757298166586544 0.7039601238506605  
0.2242793988485859 0.3757298166586544 0.7960398761493395  
0.7757206011514139 0.6242701833413461 0.2039600938506576  
0.7242793988485861 0.1242701833413457 0.2039600938506576  
0.2757206011514139 0.8757298166586539 0.7960398761493395  
0.7757206011514139 0.8757298166586539 0.7039601238506605  
0.2242793988485859 0.1242701833413457 0.2960399061493423  
0.9243735133612596 0.7140289843758346 0.2681233916343252  
0.0756265166387435 0.2859710156241655 0.7318765783656727  
0.5756264866387406 0.2859710156241655 0.7681234216343273

0.4243734833612565 0.7140289843758346 0.2318766083656750  
0.0756265166387435 0.2140289843758344 0.2318766083656750  
0.9243735133612594 0.7859710156241654 0.7681234216343273  
0.4243734833612564 0.7859710156241654 0.7318765783656727  
0.5756264866387406 0.2140289843758344 0.2681233916343252  
0.7775499835041269 0.1527840017180699 0.4552137727966742  
0.2224500164958726 0.8472159832819317 0.5447861972033300  
0.7224500164958731 0.8472159832819317 0.9552138027966700  
0.2775499835041279 0.1527840017180699 0.0447862272033256  
0.2224500164958726 0.6527840167180683 0.0447862272033256  
0.7775499835041269 0.3472159832819324 0.9552138027966700  
0.2775499835041279 0.3472159832819324 0.5447861972033300  
0.7224500164958731 0.6527840167180683 0.4552137727966742  
0.7376605032442346 0.3422435985145553 0.3239382685515421  
0.2623394967557653 0.6577564014854451 0.6760617614484536  
0.7623394967557654 0.6577564014854451 0.8239382385515464  
0.2376605032442347 0.3422435985145553 0.1760617314484583  
0.2623394967557653 0.8422435985145549 0.1760617314484583  
0.7376605032442346 0.1577564014854450 0.8239382385515464  
0.2376605032442347 0.1577564014854450 0.6760617614484536  
0.7623394967557654 0.8422435985145549 0.3239382685515421  
0.7548832642317115 0.5856929033957022 0.3004177769247336  
0.2451167357682882 0.4143070966042977 0.6995822230752659  
0.7451167357682885 0.4143070966042977 0.8004177769247341  
0.2548832642317119 0.5856929033957022 0.1995822230752660  
0.2451167357682882 0.0856929033957023 0.1995822230752660  
0.7548832642317115 0.9143070966042977 0.8004177769247341  
0.2548832642317119 0.9143070966042977 0.6995822230752659  
0.7451167357682885 0.0856929033957023 0.3004177769247336

0.6185444272507785 0.2723860396004694 0.5118420255754710  
0.3814555727492214 0.7276139603995306 0.4881579744245288  
0.8814555727492215 0.7276139603995306 0.0118420255754713  
0.1185444272507785 0.2723860396004694 0.9881579744245290  
0.3814555727492214 0.7723860396004694 0.9881579744245290  
0.6185444272507785 0.2276139603995310 0.0118420255754713  
0.1185444272507785 0.2276139603995310 0.4881579744245288  
0.8814555727492215 0.7723860396004694 0.5118420255754710  
0.2014277429206830 0.3881826924773268 0.2754433453516339  
0.7985722570793176 0.6118172775226782 0.7245566546483660  
0.2985722570793167 0.6118172775226782 0.7754433453516340  
0.7014277429206824 0.3881826924773268 0.2245566546483659  
0.7985722570793176 0.8881827224773218 0.2245566546483659  
0.2014277429206830 0.1118173075226733 0.7754433453516340  
0.7014277429206824 0.1118173075226733 0.7245566546483660  
0.2985722570793167 0.8881827224773218 0.2754433453516339  
0.3961206507833124 0.5159202001791512 0.3939193268573063  
0.6038793492166872 0.4840797998208488 0.6060806431426986  
0.1038793492166875 0.4840797998208488 0.8939193568573014  
0.8961206507833128 0.5159202001791512 0.1060806731426937  
0.6038793492166872 0.0159202001791514 0.1060806731426937  
0.3961206507833125 -0.0159202001791513 0.8939193568573015  
0.8961206507833128 -0.0159202001791513 0.6060806431426986  
0.1038793492166875 0.0159202001791514 0.3939193268573063  
0.0723775988301280 0.5663057062377946 0.3018470343946106  
0.9276223871698710 0.4336942937622055 0.6981529656053885  
0.4276223871698707 0.4336942937622055 0.8018470343946115  
0.5723776128301290 0.5663057062377946 0.1981529656053892  
0.9276223871698710 0.0663057062377944 0.1981529656053892



0.0723775988301280 0.9336942937622054 0.8018470343946115  
0.5723776128301290 0.9336942937622054 0.6981529656053885  
0.4276223871698707 0.0663057062377944 0.3018470343946106  
0.6028247903266245 0.5114891651195037 0.3567203902122569  
0.3971752096733767 0.4885108648804918 0.6432796397877389  
0.8971752096733755 0.4885108648804918 0.8567203602122611  
0.1028247903266236 0.5114891651195037 0.1432796097877432  
0.3971752096733767 0.0114891351195085 0.1432796097877432  
0.6028247903266245 -0.0114891651195039 0.8567203602122611  
0.1028247903266236 -0.0114891651195039 0.6432796397877389  
0.8971752096733755 0.0114891351195085 0.3567203902122569  
0.7251546501745275 0.9094935089171435 0.4683953107221854  
0.2748453498254725 0.0905064990828571 0.5316046892778145  
0.7748453498254725 0.0905064990828571 0.9683953107221855  
0.2251546501745278 0.9094935089171434 0.0316046892778149  
0.2748453498254725 0.4094935089171436 0.0316046892778149  
0.7251546501745275 0.5905064910828565 0.9683953107221855  
0.2251546501745279 0.5905064910828565 0.5316046892778145  
0.7748453498254725 0.4094935089171436 0.4683953107221854  
0.2037500432326308 0.4622371173618791 0.3622696921174802  
0.7962499417673710 0.5377629126381164 0.6377303078825199  
0.2962499417673713 0.5377629126381164 0.8622696921174801  
0.7037500582326290 0.4622371173618791 0.1377303078825198  
0.7962499417673710 0.9622370873618836 0.1377303078825198  
0.2037500432326308 0.0377628826381209 0.8622696921174801  
0.7037500582326290 0.0377628826381209 0.6377303078825199  
0.2962499417673713 0.9622370873618836 0.3622696921174802  
0.2288976919405554 0.6294028886544372 0.4291641769521619  
0.7711022780594423 0.3705971113455630 0.5708358230478388

0.2711023080594447 0.3705971113455630 0.9291641769521612  
0.7288977219405577 0.6294028886544372 0.0708358230478380  
0.7711022780594423 0.1294028886544369 0.0708358230478380  
0.2288976919405554 0.8705971113455628 0.9291641769521612  
0.7288977219405577 0.8705971113455628 0.5708358230478388  
0.2711023080594447 0.1294028886544369 0.4291641769521619  
0.2619012035338443 0.3841114500151292 0.4456668517153570  
0.7380988264661512 0.6158885199848684 0.5543331482846429  
0.2380987964661555 0.6158885199848684 0.9456668517153571  
0.7619011735338488 0.3841114500151292 0.0543331482846428  
0.7380988264661512 0.8841114800151316 0.0543331482846428  
0.2619012035338443 0.1158885499848711 0.9456668517153571  
0.7619011735338488 0.1158885499848711 0.5543331482846429  
0.2380987964661555 0.8841114800151316 0.4456668517153570  
0.5761543656015016 0.0791030952046234 0.4546484779312687  
0.4238456343984986 0.9208968977953791 0.5453515520687330  
0.9238456343984984 0.9208968977953791 0.9546484479312670  
0.0761543656015013 0.0791030952046234 0.0453515220687306  
0.4238456343984986 0.5791031022046209 0.0453515220687306  
0.5761543656015016 0.4208968977953794 0.9546484479312670  
0.0761543656015013 0.4208968977953794 0.5453515520687330  
0.9238456343984984 0.5791031022046209 0.4546484779312687  
0.1195948956568709 0.7555095941075407 0.2424346691193782  
0.8804050813431307 0.2444904058924595 0.7575653608806255  
0.3804051113431330 0.2444904058924595 0.7424346391193745  
0.6195949186568693 0.7555095941075407 0.2575653308806217  
0.8804050813431307 0.2555095941075409 0.2575653308806217  
0.1195948956568709 0.7444904058924593 0.7424346391193745  
0.6195949186568693 0.7444904058924593 0.7575653608806255

0.3804051113431330 0.2555095941075409 0.2424346691193782  
0.0613543560293031 0.8022813821262060 0.3309114665729662  
0.9386456289706988 0.1977186178737945 0.6690885034270381  
0.4386456289706989 0.1977186178737946 0.8309114965729619  
0.5613543710293012 0.8022813821262060 0.1690885334270337  
0.9386456289706988 0.3022813821262056 0.1690885334270337  
0.0613543560293031 0.6977186178737940 0.8309114965729619  
0.5613543710293012 0.6977186178737940 0.6690885034270381  
0.4386456289706990 0.3022813821262056 0.3309114665729662  
0.5569662052600332 0.3104610127426682 0.4226830468726058  
0.4430337947399673 0.6895389872573321 0.5773169531273941  
0.9430337947399668 0.6895389872573321 0.9226830468726059  
0.0569662052600329 0.3104610127426682 0.0773169531273942  
0.4430337947399673 0.8104610127426679 0.0773169531273942  
0.5569662052600332 0.1895389872573320 0.9226830468726059  
0.0569662052600329 0.1895389872573320 0.5773169531273941  
0.9430337947399668 0.8104610127426679 0.4226830468726058  
0.8040164999950138 0.5129609183752182 0.3850910459349727  
0.1959835000049854 0.4870390816247821 0.6149089840650235  
0.6959835000049862 0.4870390816247821 0.8850910159349765  
0.3040164999950144 0.5129609183752182 0.1149089540650278  
0.1959835000049854 0.0129609183752180 0.1149089540650278  
0.8040164999950138 0.9870390816247818 0.8850910159349765  
0.3040164999950144 0.9870390816247818 0.6149089840650235  
0.6959835000049862 0.0129609183752180 0.3850910459349727
